# Supplementary material for: Development and Temporal External Validation of an XGBoost-Based Clinical Prediction Model for PACU Hypoxemia in Elderly Thoracic Surgery Patients
Source: Research Square preprint supplement (doi:10.21203/rs.3.rs-8723621/v1), 2026-02-17
Supplement: Supplementary file 1 [file 3d5ee9f8d519977653ffdd1a.docx]

**Table 2 Performance of machine learning models in the internal test dataset.**

| **Model** | **AUC (95% CI)** | **Accuracy (95% CI)** | **Sensitivity (95% CI)** | **Specificity (95% CI)** | **F1 Score** |
| --- | --- | --- | --- | --- | --- |
| **XGBoost** | **0.962 (0.950–0.974)** | **0.903 (0.885–0.921)** | **0.883 (0.860–0.906)** | **0.907 (0.889–0.925)** | **0.76** |
| **Decision Tree** | **0.945 (0.930–0.960)** | **0.919 (0.900–0.938)** | **0.771 (0.745–0.797)** | **0.950 (0.935–0.965)** | **0.769** |
| **SVM** | **0.930 (0.915–0.945)** | **0.895 (0.875–0.915)** | **0.855 (0.830–0.880)** | **0.903 (0.885–0.921)** | **0.739** |
| **Random Forest** | **0.925 (0.910–0.940)** | **0.896 (0.876–0.916)** | **0.849 (0.825–0.873)** | **0.906 (0.888–0.924)** | **0.74** |
| **KNN** | **0.850 (0.830–0.870)** | **0.806 (0.780–0.832)** | **0.827 (0.800–0.854)** | **0.802 (0.775–0.829)** | **0.598** |
| **Logistic Reg.** | **0.780 (0.760–0.800)** | **0.716 (0.690–0.742)** | **0.838 (0.815–0.861)** | **0.691 (0.665–0.717)** | **0.508** |
