# Supplementary material for: Development and Temporal External Validation of an XGBoost-Based Clinical Prediction Model for PACU Hypoxemia in Elderly Thoracic Surgery Patients
Source: Research Square preprint supplement (doi:10.21203/rs.3.rs-8723621/v1), 2026-02-17
Supplement: Supplementary file 2 [file 9f01e7123b016f696999b50a.docx]

### ****Appendix 1: Clinical Characteristics and Surgical-Related Variables****

| **Category** | **Variable** | **Description / Notes** |
| --- | --- | --- |
| ****Outcome Variable**** |  |  |
|  | Hypoxemia | Primary postoperative outcome |
| ****Demographic Information**** |  |  |
|  | Age |  |
|  | Gender |  |
| ****Preoperative Comorbidities and Status**** |  |  |
|  | Smoking history |  |
|  | Alcohol drinking history |  |
|  | Heart disease |  |
|  | COPD |  |
|  | Hypertension |  |
|  | Asthma |  |
|  | Diabetes |  |
|  | Renal insufficiency |  |
|  | Pleural effusion |  |
|  | Pulmonary infection |  |
|  | Pulmonary bulla |  |
| ****Preoperative Laboratory and Physiological Indicators**** |  |  |
|  | ALB (Albumin) |  |
|  | HGB (Hemoglobin) |  |
|  | D-D (D-Dimer) |  |
|  | PaO₂ | Arterial oxygen partial pressure |
|  | PaCO₂ | Arterial carbon dioxide partial pressure |
|  | BMI | Body Mass Index |
| ****Preoperative Surgical Classification**** |  |  |
|  | ASA grade |  |
|  | Surgical type | OT: Open Thoracotomy; VATS: Video-Assisted Thoracic Surgery |
| ****Intraoperative Indicators**** |  |  |
|  | Blood loss |  |
|  | Infusion volume |  |
|  | Surgical time |  |
|  | Anesthesia time |  |
|  | Blood transfusion |  |
|  | Surgical level |  |
|  | Operative method | OT or VATS |
|  | Surgical site |  |

### ****Notes:****OT = Open Thoracotomy; VATS = Video-Assisted Thoracic Surgery; ALB = Albumin; HGB = Hemoglobin; D-D = D-Dimer.
