# Supplementary material for: Development and Temporal External Validation of an XGBoost-Based Clinical Prediction Model for PACU Hypoxemia in Elderly Thoracic Surgery Patients
Source: Research Square preprint supplement (doi:10.21203/rs.3.rs-8723621/v1), 2026-02-17
Supplement: Supplementary file 3 [file b6362a6e41a47547e7c65e47.docx]

## **Glossary of Abbreviations**

AUC: Area under the receiver operating characteristic curve

BMI: Body mass index

DCA: Decision curve analysis

LASSO: Least absolute shrinkage and selection operator

ML: Machine learning

PACU: Post-anesthesia care unit

SHAP:Shapley Additive exPlanations

XGBoost: Extreme gradient boosting

LR:Logistic Regression

SVM：Support Vector Machine

RF：Random Forest

KNN：k-Nearest Neighbors

LightGBM：Light Gradient Boosting Machine
