# Supplementary material for: Development and Temporal External Validation of an XGBoost-Based Clinical Prediction Model for PACU Hypoxemia in Elderly Thoracic Surgery Patients
Source: Research Square preprint supplement (doi:10.21203/rs.3.rs-8723621/v1), 2026-02-17
Supplement: Supplementary file 4 [file cc17e93d180384c12fdde5c3.docx]

****Table 1. Baseline Characteristics of the Study Population****

| **Variable Category** | **Variable** | **Level / Description** | **Total (N=5134)** | **Hypoxemia Group (n=967)** | **Non-Hypoxemia Group (n=4167)** | **P Value (Hypoxemia vs Non-Hypoxemia)** | **Training Set (n=4108)** | **Internal Validation Set (n=1026)** | **P Value (Training vs Internal)** | **External Validation Set (n=272)** |
| --- | --- | --- | --- | --- | --- | --- | --- | --- | --- | --- |
| ****Demographic**** | Age (years) |  | 67.00 [64.00, 71.00] | 69.00 [65.00, 73.00] | 67.00 [64.00, 71.00] | ****<0.001**** | 67.00 [64.00, 71.00] | 67.00 [64.00, 71.00] | 0.151 | 67.00 [63.00, 71.00] |
|  | Gender | Male | 2338 (45.5%) | 453 (46.8%) | 1885 (45.2%) | 0.365 | 1881 (45.8%) | 457 (44.5%) | 0.473 | 137 (50.4%) |
|  |  | Female | 2796 (54.5%) | 514 (53.2%) | 2282 (54.8%) |  | 2227 (54.2%) | 569 (55.5%) |  | 135 (49.6%) |
| ****Comorbidities**** | Smoking history | Yes | 1521 (29.6%) | 317 (32.8%) | 1204 (28.9%) | ****0.017**** | 1218 (29.6%) | 303 (29.5%) | 0.941 | 53 (19.5%) |
|  |  | No | 3613 (70.4%) | 650 (67.2%) | 2963 (71.1%) |  | 2890 (70.4%) | 723 (70.5%) |  | 219 (80.5%) |
|  | Alcohol drinking history | Yes | 651 (12.7%) | 133 (13.8%) | 518 (12.4%) | 0.265 | 531 (12.9%) | 120 (11.7%) | 0.290 | 24 (8.8%) |
|  |  | No | 4483 (87.3%) | 834 (86.2%) | 3649 (87.6%) |  | 3577 (87.1%) | 906 (88.3%) |  | 248 (91.2%) |
|  | Heart disease | Yes | 257 (5.0%) | 78 (8.1%) | 179 (4.3%) | ****<0.001**** | 205 (5.0%) | 52 (5.1%) | 0.918 | 43 (15.8%) |
|  |  | No | 4877 (95.0%) | 889 (91.9%) | 3988 (95.7%) |  | 3903 (95.0%) | 974 (94.9%) |  | 229 (84.2%) |
|  | COPD | Yes | 27 (0.5%) | 11 (1.1%) | 16 (0.4%) | ****0.004**** | 23 (0.6%) | 4 (0.4%) | 0.634 | 6 (2.2%) |
|  |  | No | 5107 (99.5%) | 956 (98.9%) | 4151 (99.6%) |  | 4085 (99.4%) | 1022 (99.6%) |  | 266 (97.8%) |
|  | Hypertension | Yes | 1273 (24.8%) | 354 (36.6%) | 919 (22.1%) | ****<0.001**** | 987 (24.0%) | 286 (27.9%) | ****0.011**** | 98 (36.0%) |
|  |  | No | 3861 (75.2%) | 613 (63.4%) | 3248 (77.9%) |  | 3121 (76.0%) | 740 (72.1%) |  | 174 (64.0%) |
|  | Asthma | Yes | 20 (0.4%) | 6 (0.6%) | 14 (0.3%) | 0.201 | 14 (0.3%) | 6 (0.6%) | 0.262 | 3 (1.1%) |
|  |  | No | 5114 (99.6%) | 961 (99.4%) | 4153 (99.7%) |  | 4094 (99.7%) | 1020 (99.4%) |  | 269 (98.9%) |
|  | Diabetes | Yes | 579 (11.3%) | 140 (14.5%) | 439 (10.5%) | ****<0.001**** | 458 (11.1%) | 121 (11.8%) | 0.559 | 50 (18.4%) |
|  |  | No | 4555 (88.7%) | 827 (85.5%) | 3728 (89.5%) |  | 3650 (88.9%) | 905 (88.2%) |  | 222 (81.6%) |
|  | Renal insufficiency | Yes | 81 (1.6%) | 26 (2.7%) | 55 (1.3%) | ****0.002**** | 60 (1.5%) | 21 (2.0%) | 0.178 | 8 (2.9%) |
|  |  | No | 5053 (98.4%) | 941 (97.3%) | 4112 (98.7%) |  | 4048 (98.5%) | 1005 (98.0%) |  | 264 (97.1%) |
| ****Preoperative Status**** | Pleural effusion | Yes | 29 (0.6%) | 5 (0.5%) | 24 (0.6%) | 0.826 | 26 (0.6%) | 3 (0.3%) | 0.247 | 1 (0.4%) |
|  |  | No | 5105 (99.4%) | 962 (99.5%) | 4143 (99.4%) |  | 4082 (99.4%) | 1023 (99.7%) |  | 271 (99.6%) |
|  | Pulmonary infection | Yes | 65 (1.3%) | 13 (1.3%) | 52 (1.2%) | 0.809 | 53 (1.3%) | 12 (1.2%) | 0.757 | 1 (0.4%) |
|  |  | No | 5069 (98.7%) | 954 (98.7%) | 4115 (98.8%) |  | 4055 (98.7%) | 1014 (98.8%) |  | 271 (99.6%) |
|  | Pulmonary bulla | Yes | 58 (1.1%) | 13 (1.3%) | 45 (1.1%) | 0.483 | 51 (1.2%) | 7 (0.7%) | 0.129 | 7 (2.6%) |
|  |  | No | 5076 (98.9%) | 954 (98.7%) | 4122 (98.9%) |  | 4057 (98.8%) | 1019 (99.3%) |  | 265 (97.4%) |
| ****Laboratory Values**** | ALB (g/L) |  | 34.98 [34.02, 40.91] | 34.75 [33.94, 40.72] | 39.01 [34.04, 40.94] | ****0.001**** | 34.97 [34.02, 40.93] | 39.02 [34.01, 40.87] | 0.636 | 138.00 [129.00, 149.00] |
|  | HGB (g/L) |  | 134.00 [122.00, 145.00] | 118.00 [112.00, 138.50] | 135.00 [126.00, 145.50] | ****<0.001**** | 134.00 [122.00, 145.00] | 133.00 [122.00, 144.00] | 0.219 | 41.86 [39.74, 44.23] |
|  | D-Dimer (mg/L) |  | 0.50 [0.40, 0.80] | 0.70 [0.41, 0.80] | 0.50 [0.40, 0.79] | 0.149 | 0.50 [0.40, 0.80] | 0.50 [0.40, 0.79] | 0.751 | 0.35 [0.29, 0.46] |
|  | PaO₂ (mmHg) |  | 91.05 [83.73, 98.90] | 86.50 [77.70, 97.00] | 91.80 [85.20, 99.30] | ****<0.001**** | 91.20 [83.90, 99.30] | 90.30 [83.45, 98.00] | 0.052 | 87.60 [80.07, 95.32] |
|  | PaCO₂ (mmHg) |  | 39.90 [38.30, 41.50] | 40.00 [38.40, 41.60] | 39.90 [38.30, 41.50] | 0.184 | 39.90 [38.30, 41.50] | 39.90 [38.20, 41.60] | 0.877 | 39.55 [37.40, 41.30] |
|  | BMI (kg/m²) |  | 24.22 [22.15, 26.22] | 25.56 [23.44, 27.72] | 23.88 [21.97, 25.81] | ****<0.001**** | 24.22 [22.15, 26.22] | 24.22 [22.16, 26.12] | 0.921 | 24.09 [22.30, 26.29] |
| ****Surgical Classification**** | ASA Grade | I | 16 (0.3%) | 1 (0.1%) | 15 (0.4%) | ****<0.001**** | 15 (0.4%) | 1 (0.1%) | 0.413 | 1 (0.4%) |
|  |  | II | 4112 (80.1%) | 699 (72.3%) | 3413 (81.9%) |  | 3284 (79.9%) | 828 (80.7%) |  | 222 (81.6%) |
|  |  | III | 1006 (19.6%) | 267 (27.6%) | 739 (17.7%) |  | 809 (19.7%) | 197 (19.2%) |  | 49 (18.0%) |
|  | Surgical type | Emergency operation | 41 (0.8%) | 10 (1.0%) | 31 (0.7%) | 0.361 | 36 (0.9%) | 5 (0.5%) | 0.210 | 1 (0.4%) |
|  |  | Elective surgery | 5093 (99.2%) | 957 (99.0%) | 4136 (99.3%) |  | 4072 (99.1%) | 1021 (99.5%) |  | 271 (99.6%) |
| ****Intraoperative Details**** | Blood loss (mL) |  | 20.00 [20.00, 50.00] | 20.00 [20.00, 50.00] | 20.00 [20.00, 50.00] | 0.402 | 20.00 [20.00, 50.00] | 20.00 [20.00, 50.00] | 0.984 | 80.00 [60.00, 125.00] |
|  | Infusion volume (mL) |  | 1200.00 [1100.00, 1600.00] | 1205.00 [1103.00, 1650.00] | 1200.00 [1100.00, 1600.00] | ****<0.001**** | 1200.00 [1100.00, 1600.00] | 1200.00 [1100.00, 1600.00] | 0.622 | 1200.00 [1128.75, 1601.25] |
|  | Surgical time (hours) |  | 1.33 [0.92, 1.83] | 1.33 [0.92, 1.83] | 1.33 [0.92, 1.83] | 0.383 | 1.33 [0.92, 1.83] | 1.33 [0.92, 1.78] | 0.415 | 1.50 [0.94, 2.00] |
|  | Anesthesia time (hours) |  | 1.78 [1.33, 2.33] | 1.75 [1.33, 2.33] | 1.78 [1.33, 2.33] | 0.344 | 1.78 [1.33, 2.33] | 1.75 [1.33, 2.25] | 0.442 | 1.92 [1.38, 2.50] |
|  | Blood transfusion | Yes | 39 (0.8%) | 11 (1.1%) | 28 (0.7%) | 0.133 | 31 (0.8%) | 8 (0.8%) | 0.934 | 4 (1.5%) |
|  |  | No | 5095 (99.2%) | 956 (98.9%) | 4139 (99.3%) |  | 4077 (99.2%) | 1018 (99.2%) |  | 268 (98.5%) |
|  | Surgical level‡ | II（0） | 9 (0.2%) | 3 (0.3%) | 6 (0.1%) | 0.192 | 8 (0.2%) | 1 (0.1%) | 0.688 | 1 (0.4%) |
|  |  | III（1） | 272 (5.3%) | 43 (4.4%) | 229 (5.5%) |  | 213 (5.2%) | 59 (5.8%) |  | 11 (4.0%) |
|  |  | V（2） | 4853 (94.5%) | 921 (95.2%) | 3932 (94.4%) |  | 3887 (94.6%) | 966 (94.2%) |  | 260 (95.6%) |
|  | Operative method‡ | OT | 44 (0.9%) | 10 (1.0%) | 34 (0.8%) | 0.507 | 36 (0.9%) | 8 (0.8%) | 0.764 | 1 (0.4%) |
|  |  | VATS | 5090 (99.1%) | 957 (99.0%) | 4133 (99.2%) |  | 4072 (99.1%) | 1018 (99.2%) |  | 271 (99.6%) |
|  | Surgical site | Right lung | 2705 (52.7%) | 185 (19.1%) | 2520 (60.5%) | ****<0.001**** | 2150 (52.3%) | 555 (54.1%) | 0.757 | 135 (49.6%) |
|  |  | Left lung | 2308 (45.0%) | 732 (75.7%) | 1576 (37.8%) |  | 1863 (45.4%) | 445 (43.4%) |  | 128 (47.1%) |
|  |  | sophagus | 12 (0.2%) | 6 (0.6%) | 6 (0.1%) |  | 10 (0.2%) | 2 (0.2%) |  | 1 (0.4%) |
|  |  | IV (Multiple) | 89 (1.7%) | 36 (3.7%) | 53 (1.3%) |  | 70 (1.7%) | 19 (1.9%) |  | 1 (0.4%) |
|  |  | Mediastinum | 20 (0.4%) | 8 (0.8%) | 12 (0.3%) |  | 15 (0.4%) | 5 (0.5%) |  | 7 (2.6%) |
|  | Cut level | I | 4732 (92.2%) | 890 (92.0%) | 3842 (92.2%) | 0.448 | 3794 (92.4%) | 938 (91.4%) | 0.247 | 180 (66.2%) |
|  |  | II | 48 (0.9%) | 6 (0.6%) | 42 (1.0%) |  | 34 (0.8%) | 14 (1.4%) |  | 10 (3.7%) |
|  |  | III | 354 (6.9%) | 71 (7.3%) | 283 (6.8%) |  | 280 (6.8%) | 74 (7.2%) |  | 82 (30.1%) |

****Table Notes:****Data are presented as ****median [interquartile range]**** for continuous variables and ****n (%)**** for categorical variables.M ± SD, mean ± standard ;deviationCategories with very low frequency (e.g., ASA III, Surgical Level 0, etc.) are included for completeness. Some variable names (Surgical_type, Operative_method) appear to measure similar concepts (OT vs. VATS); consider clarifying or merging in the manuscript text based on actual definitions.****Abbreviations****: ALB, albumin; HGB, hemoglobin; BMI, body mass index; COPD, chronic obstructive pulmonary disease; ASA, American Society of Anesthesiologists; VATS, video-assisted thoracic surgery.
